# Supplementary material for: Utilization and Cost of an Employer-Sponsored Comprehensive Primary Care Delivery Model
Source: PubMed Central journal article supplement — JAMA Netw Open. 2020 Apr 30;3(4):e203803. doi: 10.1001/jamanetworkopen.2020.3803 (PMC7193330; doi:10.1001/jamanetworkopen.2020.3803), 2020-04-30

## Supplementary Online Content

Basu S, Zhang T, Gilmore A, Datta E, Kim EY. Utilization and cost of an employer-sponsored comprehensive primary care delivery model. *JAMA Netw Open*. 2020;3(4):e203803. doi:10.1001/jamanetworkopen.2020.3803

**eTable 1.** Specialty Designations of Primary Care Providers

**eTable 2.** Allowed Amount Schedule (by Visit Code) for Common Current Procedural Terminology (CPT) Billing Codes

**eTable 3.** Unadjusted Descriptive Statistics Among Persons Primarily Using the On-Site Clinic Versus Primarily Using the Near-Site Clinics for Their Primary Care Evaluation and Management Visits

**eTable 4.** Percent Differences in Spending (\$US 2019)

**eTable 5.** Percent Differences in Utilization (Encounters per 1,000 Member Months)

**eTable 6.** Percent Differences in Spending per Encounter (\$US 2019/Encounter)

**eTable 7.** Sensitivity Analysis on Percent Differences in Spending (\$US 2019)

**eTable 8.** Sensitivity Analysis on Percent Differences in Utilization (Encounters per 1,000 Member Months)

**eTable 9.** Sensitivity Analysis on Percent Differences in Spending per Encounter (\$US 2019/encounter)

**eTable 10.** Descriptive Statistics for the Primary Treatment Group Versus the Alternative Control Group of Unsubsidized Members From Other Employers

**eTable 11.** Sensitivity Analysis of Alternative Control Group

**eTable 12.** Sensitivity Analysis on Percent Differences in Spending (\$US 2019)

**eTable 13.** Sensitivity Analysis on Percent Differences in Utilization (Encounters per 1,000 Member Months)

**eTable 14.** Sensitivity Analysis on Percent Differences in Spending per Encounter (\$US 2019/Encounter)

**eFigure 1.** Quantile-Quantile Plot of Log-Transformed Total Medical and Pharmaceutical Spending (\$US 2019) Compared to the Theoretically-Optimal Line For Ordinary Least Squares Regression

**eFigure 2.** Absolute Differences in Spending, Utilization, and Spending per Encounter

This supplementary material has been provided by the authors to give readers additional information about their work.

**eTable 1.** Specialty designations of primary care providers.

|                     |
|---------------------|
| General Practice    |
| Pediatrics          |
| Family Medicine     |
| Adolescent Medicine |
| Adult Medicine      |
| Geriatric Medicine  |
| Internal Medicine   |

**eTable 2.** Allowed amount schedule (by visit code) for common Current Procedural Terminology (CPT) billing codes.

| CPT   | Fee (\$US 2019) | Description                  |
|-------|-----------------|------------------------------|
| 10040 | 209.21          | Acne surgery                 |
| 10060 | 226.71          | Drainage of skin abscess     |
| 10061 | 390.16          | Drainage of skin abscess     |
| 10080 | 358.1           | Drainage of pilonidal cyst   |
| 10081 | 528.99          | Drainage of pilonidal cyst   |
| 10120 | 294.12          | Remove foreign body          |
| 10160 | 249.4           | Puncture drainage of lesion  |
| 11000 | 105.68          | Debride infected skin        |
| 11055 | 109.96          | Trim skin lesion             |
| 11056 | 130.58          | Trim skin lesions 2 to 4     |
| 11102 | 191.7           | Tangntl bx skin single les   |
| 11103 | 103.15          | Tangntl bx skin ea sep/addl  |
| 11104 | 241.08          | Punch bx skin single lesion  |
| 11105 | 117.98          | Punch bx skin ea sep/addl    |
| 11106 | 291.51          | Incal bx skn single les      |
| 11107 | 139.07          | Incal bx skn ea sep/addl     |
| 11200 | 169.47          | Removal of skin tags <w/15   |
| 11201 | 35.02           | Remove skin tags add-on      |
| 11300 | 190.33          | Shave skin lesion 0.5 cm/<   |
| 11301 | 231.68          | Shave skin lesion 0.6-1.0 cm |
| 11302 | 270.95          | Shave skin lesion 1.1-2.0 cm |
| 11303 | 297.7           | Shave skin lesion >2.0 cm    |
| 11305 | 198.3           | Shave skin lesion 0.5 cm/<   |
| 11306 | 235.06          | Shave skin lesion 0.6-1.0 cm |
| 11307 | 277.6           | Shave skin lesion 1.1-2.0 cm |
| 11310 | 220.65          | Shave skin lesion 0.5 cm/<   |
| 11311 | 262             | Shave skin lesion 0.6-1.0 cm |
| 11312 | 306.28          | Shave skin lesion 1.1-2.0 cm |
| 11400 | 240.65          | Exc tr-ext b9+marg 0.5 cm<   |
| 11401 | 290.76          | Exc tr-ext b9+marg 0.6-1 cm  |
| 11402 | 322.45          | Exc tr-ext b9+marg 1.1-2 cm  |
| 11403 | 370.18          | Exc tr-ext b9+marg 2.1-3cm   |
| 11406 | 594.47          | Exc tr-ext b9+marg >4.0 cm   |
| 11420 | 240.2           | Exc h-f-nk-sp b9+marg 0.5/<  |
| 11421 | 302.5           | Exc h-f-nk-sp b9+marg 0.6-1  |
| 11422 | 340             | Exc h-f-nk-sp b9+marg 1.1-2  |
| 11440 | 266.54          | Exc face-mm b9+marg 0.5 cm/< |
| 11441 | 325.67          | Exc face-mm b9+marg 0.6-1 cm |
| 11442 | 362.22          | Exc face-mm b9+marg 1.1-2 cm |
| 11600 | 374.18          | Exc tr-ext mal+marg 0.5 cm/< |
| 11601 | 439.2           | Exc tr-ext mal+marg 0.6-1 cm |
| 11602 | 475.23          | Exc tr-ext mal+marg 1.1-2 cm |
| 11603 | 540.21          | Exc tr-ext mal+marg 2.1-3 cm |
| 11620 | 376.66          | Exc h-f-nk-sp mal+marg 0.5/< |
| 11621 | 440.97          | Exc s/n/h/f/g mal+mrg 0.6-1  |
| 11622 | 490.34          | Exc s/n/h/f/g mal+mrg 1.1-2  |
| 11640 | 388.54          | Exc f/e/e/n/1 mal+mrg 0.5cm< |
| 11641 | 456.36          | Exc f/e/e/n/1 mal+mrg 0.6-1  |
| 11642 | 518.15          | Exc f/e/e/n/1 mal+mrg 1.1-2  |
| 11730 | 209.56          | Removal of nail plate        |
| 11732 | 62.4            | Remove nail plate add-on     |
| 11740 | 100.25          | Drain blood from under nail  |
| 11750 | 298.27          | Removal of nail bed          |
| 11760 | 370.95          | Repair of nail bed           |
| 11900 | 103.59          | Inject skin lesions </w 7    |
| 11901 | 129.42          | Inject skin lesions >7       |
| 11980 | 179.49          | Implant hormone pellet(s)    |
| 11981 | 269.31          | Insert drug implant device   |

|       |        |                              |
|-------|--------|------------------------------|
| 11982 | 297.12 | Remove drug implant device   |
| 11983 | 427.62 | Remove/insert drug implant   |
| 12001 | 170.44 | Rpr s/n/ax/gen/trnk 2.5cm/<  |
| 12002 | 206.09 | Rpr s/n/ax/gen/trnk2.6-7.5cm |
| 12011 | 207.65 | Rpr f/e/e/n/l/m 2.5 cm/<     |
| 12021 | 315.19 | Closure of split wound       |
| 15786 | 473.66 | Abrasion lesion single       |
| 15787 | 87.32  | Abrasion lesions add-on      |
| 16000 | 132.27 | Initial treatment of burn(s) |
| 17000 | 124.68 | Destruct premalg lesion      |
| 17003 | 10.8   | Destruct premalg les 2-14    |
| 17004 | 290.76 | Destroy premal lesions 15/>  |
| 17110 | 214.9  | Destruct b9 lesion 1-14      |
| 17111 | 252.92 | Destruct lesion 15 or more   |
| 17250 | 158.63 | Chem caut of granltj tissue  |
| 17260 | 181.44 | Destruction of skin lesions  |
| 17261 | 278.28 | Destruction of skin lesions  |
| 17262 | 337.41 | Destruction of skin lesions  |
| 17263 | 367.66 | Destruction of skin lesions  |
| 17270 | 285.48 | Destruction of skin lesions  |
| 17271 | 314.19 | Destruction of skin lesions  |
| 17272 | 357.84 | Destruction of skin lesions  |
| 17280 | 268.01 | Destruction of skin lesions  |
| 17281 | 341.13 | Destruction of skin lesions  |
| 17282 | 390.87 | Destruction of skin lesions  |
| 19000 | 212.49 | Drainage of breast lesion    |
| 20526 | 144.66 | Ther injection carp tunnel   |
| 20550 | 99.04  | Inj tendon sheath/ligament   |
| 20551 | 100.76 | Inj tendon origin/insertion  |
| 20552 | 104.62 | Inj trigger point 1/2 muscl  |
| 20553 | 120.72 | Inject trigger points 3/>    |
| 20600 | 90.78  | Drain/inj joint/bursa w/o us |
| 20604 | 139.69 | Drain/inj joint/bursa w/us   |
| 20605 | 94.9   | Drain/inj joint/bursa w/o us |
| 20606 | 153.91 | Drain/inj joint/bursa w/us   |
| 20610 | 112.1  | Drain/inj joint/bursa w/o us |
| 20611 | 172.91 | Drain/inj joint/bursa w/us   |
| 20612 | 113.69 | Aspirate/inj ganglion cyst   |
| 24640 | 191.58 | Treat elbow dislocation      |
| 28190 | 502.64 | Removal of foot foreign body |
| 29125 | 124.42 | Apply forearm splint         |
| 29130 | 77.38  | Application of finger splint |
| 29515 | 136.26 | Application lower leg splint |
| 30300 | 362.15 | Remove nasal foreign body    |
| 40490 | 241.22 | Biopsy of lip                |
| 40808 | 370.04 | Biopsy of mouth lesion       |
| 40819 | 613.1  | Excise lip or cheek fold     |
| 41010 | 407.02 | Incision of tongue fold      |
| 46083 | 354.94 | Incise external hemorrhoid   |
| 46320 | 365.22 | Removal of hemorrhoid clot   |
| 46600 | 186.87 | Diagnostic anoscopy spx      |
| 46601 | 264.99 | Diagnostic anoscopy          |
| 46607 | 373.06 | Diagnostic anoscopy & biopsy |
| 46910 | 502.48 | Destruction anal lesion(s)   |
| 46916 | 464.03 | Cryosurgery anal lesion(s)   |
| 46922 | 544.2  | Excision of anal lesion(s)   |
| 54056 | 271.73 | Cryosurgery penis lesion(s)  |
| 54065 | 420.48 | Destruction penis lesion(s)  |
| 54100 | 379.59 | Biopsy of penis              |
| 56405 | 214.26 | I & d of vulva/perineum      |
| 56420 | 258.42 | Drainage of gland abscess    |
| 56501 | 273.83 | Destroy vulva lesions sim    |
| 56515 | 442.23 | Destroy vulva lesion/s compl |
| 56605 | 160.37 | Biopsy of vulva/perineum     |
| 56606 | 70.99  | Biopsy of vulva/perineum     |
| 56820 | 214.86 | Exam of vulva w/scope        |

|       |         |                              |
|-------|---------|------------------------------|
| 56821 | 285.71  | Exam/biopsy of vulva w/scope |
| 57061 | 235.59  | Destroy vag lesions simple   |
| 57065 | 386.28  | Destroy vag lesions complex  |
| 57100 | 173.08  | Biopsy of vagina             |
| 57170 | 121.42  | Fitting of diaphragm/cap     |
| 57420 | 225.59  | Exam of vagina w/scope       |
| 57421 | 302.17  | Exam/biopsy of vag w/scope   |
| 57452 | 213.59  | Exam of cervix w/scope       |
| 57454 | 290.78  | Bx/curett of cervix w/scope  |
| 57455 | 276.24  | Biopsy of cervix w/scope     |
| 57456 | 260.12  | Endocerv curettage w/scope   |
| 57500 | 256.93  | Biopsy of cervix             |
| 57505 | 213.24  | Endocervical curettage       |
| 57510 | 256.16  | Cauterization of cervix      |
| 57511 | 293.54  | Cryocautery of cervix        |
| 57513 | 304.03  | Laser surgery of cervix      |
| 58100 | 174.17  | Biopsy of uterus lining      |
| 58110 | 93.6    | Bx done w/colposcopy add-on  |
| 58300 | 150.4   | Insert intrauterine device   |
| 58301 | 177.97  | Remove intrauterine device   |
| 59425 | 846.6   | Antepartum care only         |
| 59426 | 1514.36 | Antepartum care only         |
| 59430 | 361.3   | Care after delivery          |
| 62322 | 294.36  | Njx interlaminar lmbtr/sac   |
| 64400 | 260.42  | Njx aa&/strd trigeminal nrv  |
| 64450 | 148.09  | Njx aa&/strd other pn/branch |
| 64455 | 89.23   | N block inj plantar digit    |
| 64505 | 221.37  | N block spenopalatine gangl  |
| 67810 | 342.19  | Biopsy eyelid & lid margin   |
| 67850 | 417.83  | Treat eyelid lesion          |
| 69100 | 189.21  | Biopsy of external ear       |
| 69200 | 156.32  | Clear outer ear canal        |
| 69209 | 28.22   | Remove impacted ear wax uni  |
| 69210 | 88.62   | Remove impacted ear wax uni  |
| 76801 | 236.7   | Ob us < 14 wks single fetus  |
| 76801 | 236.7   | Ob us < 14 wks single fetus  |
| 76801 | 236.7   | Ob us < 14 wks single fetus  |
| 76802 | 120.67  | Ob us < 14 wks addl fetus    |
| 76802 | 120.67  | Ob us < 14 wks addl fetus    |
| 76802 | 120.67  | Ob us < 14 wks addl fetus    |
| 76815 | 163.01  | Ob us limited fetus(s)       |
| 76815 | 163.01  | Ob us limited fetus(s)       |
| 76815 | 163.01  | Ob us limited fetus(s)       |
| 76817 | 186.87  | Transvaginal us obstetric    |
| 76817 | 186.87  | Transvaginal us obstetric    |
| 76817 | 186.87  | Transvaginal us obstetric    |
| 76830 | 238.24  | Transvaginal us non-ob       |
| 76830 | 238.24  | Transvaginal us non-ob       |
| 76830 | 238.24  | Transvaginal us non-ob       |
| 76881 | 172.73  | Us compl joint r-t w/img     |
| 76881 | 172.73  | Us compl joint r-t w/img     |
| 76881 | 172.73  | Us compl joint r-t w/img     |
| 76882 | 110.41  | Us lmtd jt/nonvasc xtr strux |
| 76882 | 110.41  | Us lmtd jt/nonvasc xtr strux |
| 76882 | 110.41  | Us lmtd jt/nonvasc xtr strux |
| 76942 | 108.27  | Echo guide for biopsy        |
| 76942 | 108.27  | Echo guide for biopsy        |
| 76942 | 108.27  | Echo guide for biopsy        |
| 86580 | 16.82   | Tb intradermal test          |
| 90460 | 31.86   | Im admin 1st/only component  |
| 90461 | 24.18   | Im admin each addl component |
| 90471 | 31.86   | Immunization admin           |
| 90472 | 24.18   | Immunization admin each add  |
| 90473 | 31.86   | Immune admin oral/nasal      |
| 90474 | 24.18   | Immune admin oral/nasal addl |
| 90632 | 97.91   | Hepa vaccine adult im        |

|       |        |                                |
|-------|--------|--------------------------------|
| 90656 | 33.23  | Iiv3 vacc no prsv 0.5 ml im    |
| 90662 | 89.68  | Iiv no prsv increased ag im    |
| 90670 | 344.64 | Pcv13 vaccine im               |
| 90674 | 40.41  | Cciiiv4 vac no prsv 0.5 ml im  |
| 90675 | 487.22 | Rabies vaccine im              |
| 90685 | 36.66  | Iiv4 vacc no prsv 0.25 ml im   |
| 90686 | 31.98  | Iiv4 vacc no prsv 0.5 ml im    |
| 90688 | 29.97  | Iiv4 vaccine spl't 0.5 ml im   |
| 90691 | 117.43 | Typhoid vaccine im             |
| 90714 | 38.86  | Td vacc no presv 7 yrs+ im     |
| 90715 | 54.33  | Tdap vaccine 7 yrs/> im        |
| 90732 | 181.04 | Ppsv23 vacc 2 yrs+ subq/im     |
| 90740 | 218.84 | Hepb vacc 3 dose immunosup im  |
| 90744 | 43.92  | Hepb vacc 3 dose ped/adol im   |
| 90746 | 109.42 | Hepb vaccine 3 dose adult im   |
| 90756 | 38.3   | Cciiiv4 vacc abx free im       |
| 90791 | 250.23 | Psych diagnostic evaluation    |
| 90792 | 281    | Psych diag eval w/med srvc     |
| 90832 | 122.06 | Psytx w pt 30 minutes          |
| 90833 | 126.46 | Psytx w pt w e/m 30 min        |
| 90834 | 162.41 | Psytx w pt 45 minutes          |
| 90836 | 160.06 | Psytx w pt w e/m 45 min        |
| 90837 | 243.82 | Psytx w pt 60 minutes          |
| 90838 | 211.44 | Psytx w pt w e/m 60 min        |
| 90839 | 254.19 | Psytx crisis initial 60 min    |
| 90840 | 122.06 | Psytx crisis ea add'l 30 min   |
| 93000 | 32.28  | Electrocardiogram complete     |
| 93005 | 16.82  | Electrocardiogram tracing      |
| 94010 | 69.34  | Breathing capacity test        |
| 94010 | 69.34  | Breathing capacity test        |
| 94010 | 69.34  | Breathing capacity test        |
| 94150 | 50.18  | Vital capacity test            |
| 94150 | 50.18  | Vital capacity test            |
| 94150 | 50.18  | Vital capacity test            |
| 94640 | 36.06  | Airway inhalation treatment    |
| 94664 | 33.92  | Evaluate pt use of inhaler     |
| 94760 | 4.7    | Measure blood oxygen level     |
| 95115 | 18.24  | Immunotherapy one injection    |
| 95117 | 21.09  | Immunotherapy injections       |
| 96150 | 41.78  | Health and behavior assessment |
| 96151 | 40.93  | Health and behavior assessment |
| 96160 | 6.42   | Pt-focused hlth risk assmt     |
| 96372 | 31.86  | Ther/proph/diag inj sc/im      |
| 97014 | 28.22  | Electric stimulation therapy   |
| 97032 | 27.66  | Electrical stimulation         |
| 97035 | 25.84  | Ultrasound therapy             |
| 97110 | 57.86  | Therapeutic exercises          |
| 97112 | 66.01  | Neuromuscular reeducation      |
| 97116 | 57.14  | Gait training therapy          |
| 97140 | 52.61  | Manual therapy 1/> regions     |
| 97161 | 160.07 | Pt eval low complex 20 min     |
| 97162 | 160.07 | Pt eval mod complex 30 min     |
| 97163 | 160.07 | Pt eval high complex 45 min    |
| 97164 | 109.35 | Pt re-eval est plan care       |
| 97530 | 76.47  | Therapeutic activities         |
| 97597 | 174.98 | Rmvl devital tis 20 cm/<       |
| 97760 | 91.67  | Orthotic mgmt&traing 1st enc   |
| 97810 | 67.48  | Acupunct w/o stimul 15 min     |
| 97811 | 50.75  | Acupunct w/o stimul add'l 15m  |
| 97813 | 74.21  | Acupunct w/stimul 15 min       |
| 97814 | 59.62  | Acupunct w/stimul add'l 15m    |
| 98925 | 58.91  | Osteopath manj 1-2 regions     |
| 98926 | 84.43  | Osteopath manj 3-4 regions     |
| 98927 | 110.66 | Osteopath manj 5-6 regions     |
| 98928 | 134.04 | Osteopath manj 7-8 regions     |
| 98929 | 160.28 | Osteopath manj 9-10 regions    |

|       |        |                              |
|-------|--------|------------------------------|
| 98940 | 52.79  | Chiropract manj 1-2 regions  |
| 98941 | 76.46  | Chiropract manj 3-4 regions  |
| 98942 | 98.42  | Chiropractic manj 5 regions  |
| 98943 | 50.36  | Chiropract manj xtrspnl 1/>  |
| 98960 | 54.3   | Self-mgmt educ & train 1 pt  |
| 98966 | 25.53  | Hc pro phone call 5-10 min   |
| 98967 | 49.33  | Hc pro phone call 11-20 min  |
| 98968 | 72.71  | Hc pro phone call 21-30 min  |
| 99173 | 5.41   | Visual acuity screen         |
| 99201 | 86.67  | Office/outpatient visit new  |
| 99202 | 143.52 | Office/outpatient visit new  |
| 99203 | 202.02 | Office/outpatient visit new  |
| 99204 | 304.57 | Office/outpatient visit new  |
| 99205 | 381.76 | Office/outpatient visit new  |
| 99211 | 43.9   | Office/outpatient visit est  |
| 99212 | 85.54  | Office/outpatient visit est  |
| 99213 | 139.22 | Office/outpatient visit est  |
| 99214 | 203.27 | Office/outpatient visit est  |
| 99215 | 271.09 | Office/outpatient visit est  |
| 99241 | 89.26  | Office consultation          |
| 99242 | 166.64 | Office consultation          |
| 99243 | 227.76 | Office consultation          |
| 99244 | 338.54 | Office consultation          |
| 99245 | 411.96 | Office consultation          |
| 99354 | 238.41 | Prolong e&m/psycctx serv o/p |
| 99381 | 208.55 | Init pm e/m new pat infant   |
| 99382 | 218.16 | Init pm e/m new pat 1-4 yrs  |
| 99383 | 226.63 | Prev visit new age 5-11      |
| 99384 | 255.02 | Prev visit new age 12-17     |
| 99385 | 246.68 | Prev visit new age 18-39     |
| 99386 | 285.32 | Prev visit new age 40-64     |
| 99387 | 309.33 | Init pm e/m new pat 65+ yrs  |
| 99391 | 187.78 | Per pm reeval est pat infant |
| 99392 | 200    | Prev visit est age 1-4       |
| 99393 | 199.29 | Prev visit est age 5-11      |
| 99394 | 218.08 | Prev visit est age 12-17     |
| 99395 | 222.67 | Prev visit est age 18-39     |
| 99396 | 236.87 | Prev visit est age 40-64     |
| 99397 | 255.02 | Per pm reeval est pat 65+ yr |
| 99401 | 73.72  | Preventive counseling indiv  |
| 99402 | 119.48 | Preventive counseling indiv  |
| 99403 | 164.68 | Preventive counseling indiv  |
| 99404 | 209.81 | Preventive counseling indiv  |
| 99406 | 27.45  | Behav chng smoking 3-10 min  |
| 99495 | 308.74 | Trans care mgmt 14 day disch |
| 99496 | 434.65 | Trans care mgmt 7 day disch  |
| 99497 | 156.23 | Advncd care plan 30 min      |
| G0101 | 73.37  | Ca screen;pelvic/breast exam |
| G0402 | 310.6  | Initial preventive exam      |
| G0438 | 321    | Ppps, initial visit          |
| G0439 | 218.95 | Ppps, subseq visit           |
| J0171 | 1.25   | Adrenalin epinephrine inject |
| J0561 | 23.28  | Penicillin g benzathine inj  |
| J0585 | 10.32  | Injection,onabotulinumtoxina |
| J0696 | 1.09   | Ceftriaxone sodium injection |
| J0702 | 11.59  | Betamethasone acet&sod phosp |
| J1030 | 11.09  | Methylprednisolone 40 mg inj |
| J1040 | 21.62  | Methylprednisolone 80 mg inj |
| J1050 | 0.95   | Medroxyprogesterone acetate  |
| J1071 | 0.05   | Inj testosterone cypionate   |
| J1100 | 0.19   | Dexamethasone sodium phos    |
| J1580 | 2.85   | Garamycin gentamicin inj     |
| J1750 | 22.89  | Inj iron dextran             |
| J1885 | 0.87   | Ketorolac tromethamine inj   |
| J2250 | 0.22   | Inj midazolam hydrochloride  |
| J2550 | 3.46   | Promethazine hcl injection   |

|       |        |                              |
|-------|--------|------------------------------|
| J2930 | 11.65  | Methylprednisolone injection |
| J3301 | 2.86   | Triamcinolone acet inj nos   |
| J3420 | 2.93   | Vitamin b12 injection        |
| J7325 | 19.94  | Synvisc or synvisc-one       |
| J7613 | 0.08   | Albuterol non-comp unit      |
| J8540 | 0.11   | Oral dexamethasone           |
| Q0091 | 83.56  | Obtaining screen pap smear   |
| Q2035 | 30.65  | Afluria vacc, 3 yrs & >, im  |
| 11100 | 166.64 | Skin biopsy                  |
| 36415 | 3.83   | Routine venipuncture         |
| 90649 | 290.65 | 4vhpv vaccine 3 dose im      |
| 90651 | 394.08 | 9vhpv vaccine 2/3 dose im    |
| 90707 | 135.6  | Mmr vaccine sc               |
| 90713 | 60.66  | Poliovirus ipv sc/im         |
| 90716 | 234.6  | Var vaccine live subq        |
| 90734 | 221.9  | Menacwyd/menacwycrm vacc im  |
| 90736 | 386.23 | Hzv vaccine live subq        |
| 97001 | 121.06 | Physical therapy evaluation  |
| 97002 | 64.42  | Physical therapy evaluation  |
| 97010 | 9.06   | Hot or cold packs therapy    |
| 97033 | 41.34  | Electric current therapy     |
| G0008 | 20.51  | Admin influenza virus vac    |
| Q2038 | 22.58  | Fluzone vacc, 3 yrs & >, im  |



**eTable 3.** Unadjusted descriptive statistics among persons primarily using the on-site clinic versus primarily using the near-site clinics for their primary care evaluation and management visits.

| Demographics                                      | Primarily using near-site clinics | Primarily using on-site clinic | P value | Standardized mean difference |
|---------------------------------------------------|-----------------------------------|--------------------------------|---------|------------------------------|
| N                                                 | 1058                              | 925                            | -       | -                            |
| Age, yrs (SD)                                     | 31.3 (8.7)                        | 30.3 (8.3)                     | 0.010   | 0.116                        |
| Female, N (%)                                     | 204 (19.3)                        | 107 (11.6)                     | <0.001  | 0.215                        |
| HCC risk score (including those at zero risk, SD) | 0.002 (0.023)                     | 0.002 (0.023)                  | 0.947   | 0.003                        |
| Months of enrollment (SD)                         | 34.9 (13.1)                       | 32.8 (14.2)                    | 0.001   | 0.155                        |
| <b>Spending (\$US 2019)</b>                       |                                   |                                |         |                              |
| Total medical and pharmaceutical, mean (SD)       | 278.7 (674.5)                     | 119.7 (223.4)                  | <0.001  | 0.316                        |
| Pharmaceutical, mean (SD)                         | 41.5 (226.0)                      | 12.1 (46.4)                    | <0.001  | 0.180                        |
| Emergency room, mean (SD)                         | 39.6 (173.3)                      | 2.3 (15.9)                     | <0.001  | 0.303                        |
| Hospitalization, mean (SD)                        | 7.2 (79.2)                        | 1.1 (29.6)                     | 0.028   | 0.102                        |
| Primary care, mean (SD)                           | 22.7 (25.3)                       | 22.6 (45.2)                    | 0.968   | 0.002                        |
| Specialist, mean (SD)                             | 3.2 (6.2)                         | 1.7 (6.0)                      | <0.001  | 0.246                        |
| Mental health, mean (SD)                          | 7.0 (44.3)                        | 6.7 (24.8)                     | 0.87    | 0.008                        |
| Physical therapy, mean (SD)                       | 6.3 (22.3)                        | 13.8 (52.4)                    | <0.001  | 0.186                        |
| Drug administration, mean (SD)                    | 8.7 (114.6)                       | 5.7 (19.7)                     | 0.428   | 0.037                        |
| Surgery, mean (SD)                                | 23.3 (122.0)                      | 3.3 (19.7)                     | <0.001  | 0.229                        |
| Labs/pathology, mean (SD)                         | 9.2 (19.5)                        | 2.1 (4.6)                      | <0.001  | 0.505                        |
| Imaging, mean (SD)                                | 7.4 (33.5)                        | 2.4 (30.3)                     | 0.001   | 0.155                        |
| <b>Utilization (per 1,000 member-months)</b>      |                                   |                                |         |                              |
| Emergency room, mean (SD)                         | 90.3 (296.7)                      | 6.4 (48.2)                     | <0.001  | 0.395                        |
| Hospitalization, mean (SD)                        | 5.8 (45.0)                        | 0.1 (2.4)                      | <0.001  | 0.179                        |
| Primary care, mean (SD)                           | 144.4 (149.1)                     | 137.7 (270.8)                  | 0.489   | 0.031                        |
| Specialist, mean (SD)                             | 25.9 (43.6)                       | 12.4 (43.4)                    | <0.001  | 0.310                        |
| Mental health, mean (SD)                          | 36.7 (212.9)                      | 40.4 (150.9)                   | 0.662   | 0.020                        |
| Physical therapy, mean (SD)                       | 135.3 (500.8)                     | 196.2 (729.9)                  | 0.029   | 0.097                        |
| Drug administration, mean (SD)                    | 73.3 (168.5)                      | 79.7 (275.4)                   | 0.527   | 0.028                        |
| Surgery, mean (SD)                                | 40.0 (122.6)                      | 12.1 (47.4)                    | <0.001  | 0.300                        |
| Labs/pathology, mean (SD)                         | 391.3 (511.0)                     | 127.5 (329.6)                  | <0.001  | 0.614                        |
| Imaging, mean (SD)                                | 43.8 (98.3)                       | 12.4 (50.2)                    | <0.001  | 0.402                        |
| <b>Cost per utilization episode (\$US 2019)</b>   |                                   |                                |         |                              |
| Emergency room, mean (SD)                         | 331.6 (207.0)                     | 784.6 (666.3)                  | <0.001  | 0.918                        |
| Hospitalization, mean (SD)                        | 1611.2 (2236.5)                   | 6468.7 (5966.7)                | <0.001  | 1.078                        |
| Primary care, mean (SD)                           | 155.5 (38.5)                      | 166.3 (42.3)                   | <0.001  | 0.269                        |
| Specialist, mean (SD)                             | 124.1 (50.2)                      | 145.3 (48.6)                   | <0.001  | 0.430                        |
| Mental health, mean (SD)                          | 134.3 (246.5)                     | 144.7 (144.0)                  | 0.259   | 0.052                        |
| Physical therapy, mean (SD)                       | 61.9 (42.9)                       | 67.5 (35.9)                    | 0.002   | 0.142                        |
| Drug administration, mean (SD)                    | 81.6 (150.1)                      | 68.9 (119.6)                   | 0.039   | 0.094                        |
| Surgery, mean (SD)                                | 347.8 (1167.7)                    | 217.1 (308.2)                  | 0.001   | 0.153                        |
| Labs/pathology, mean (SD)                         | 28.2 (34.4)                       | 22.3 (20.0)                    | <0.001  | 0.210                        |
| Imaging, mean (SD)                                | 127.9 (218.7)                     | 122.5 (156.0)                  | 0.529   | 0.029                        |

eTable 4. Percent differences in spending (\$US 2019).

Percent differences in spending per member per month among those typically utilizing the on-site/near-site clinics for primary care, relative to those using off-site clinics, estimated through multivariable adjusted regressions after matching. Not displayed are the 3,022 rows of additional Clinical Classifications Software (CCS) dummy variables, and home zip codes across all members, which were additional controls in all regressions. 95% confidence intervals in parentheses. \* p<0.05; \*\* p<0.01; \*\*\* p<0.001

|                                 | Total Spend     | Emergency       | Hospital        | Primary Care    | Specialist      | Mental Health   | Physical Therapy | Rx             | Drug administration | Surgery         | Labs            | Radiology       |
|---------------------------------|-----------------|-----------------|-----------------|-----------------|-----------------|-----------------|------------------|----------------|---------------------|-----------------|-----------------|-----------------|
| Treatment group, versus control | -45.0***        | -32.8***        | -15.5***        | 108.7**         | -53.8***        | 19.8***         | 9                | -25.5***       | -4.7                | -42.8***        | -31.9***        | -41.3***        |
|                                 | (-55.1, -34.9)  | (-43.9, -21.7)  | (-21.5, -9.5)   | (101.6, 115.9)  | (-61.1, -46.4)  | (12.8, 26.9)    | (-0.2, 18.2)     | (-35.4, -15.5) | (-12.5, 3.1)        | (-53.0, -32.6)  | (-40.0, -23.9)  | (-49.4, -33.2)  |
| Age, yrs                        | 0.8***          | -0.4            | -0.4**          | 0.4**           | 1.2***          | -0.1            | 1.1***           | 2.1***         | -1.9***             | 1.7***          | 1.7***          | 1.7***          |
|                                 | (0.4, 1.3)      | (-0.9, 0.1)     | (-0.6, -0.1)    | (0.1, 0.8)      | (0.8, 1.5)      | (-0.4, 0.2)     | (0.7, 1.5)       | (1.6, 2.5)     | (-2.3, -1.5)        | (1.2, 2.1)      | (1.4, 2.1)      | (1.4, 2.1)      |
| Female                          | 38.3***         | 0.6             | 3.7             | 23.7***         | -2.3            | 9.4             | -11.1            | 138.7**        | 4.3                 | 33.6***         | 53.3***         | 46.8***         |
|                                 | (23.7, 52.9)    | (-15.5, 16.7)   | (-5.0, 12.3)    | (13.4, 33.9)    | (-12.9, 8.2)    | (-0.8, 19.5)    | (-24.4, 2.2)     | (124.3, 153.2) | (-7.0, 15.6)        | (18.8, 48.3)    | (41.7, 64.9)    | (35.1, 58.4)    |
| Months of enrollment            | -3.1***         | -0.4            | -0.3*           | -2.5***         | -0.6***         | -0.4*           | -0.2             | -1.6***        | -0.8***             | 0.03            | -1.4***         | -0.3            |
|                                 | (-3.5, -2.7)    | (-0.9, 0.04)    | (-0.5, -0.01)   | (-2.8, -2.2)    | (-0.9, -0.2)    | (-0.7, -0.1)    | (-0.6, 0.2)      | (-2.1, -1.2)   | (-1.1, -0.5)        | (-0.4, 0.5)     | (-1.8, -1.1)    | (-0.7, 0.01)    |
| HCC risk score                  | -8.2            | -68.6           | 54.3            | -31.5           | -27.6           | -55.1           | -78.1            | 598.5**        | 1,121.1***          | -48.6           | -40             | -79.8           |
|                                 | (-366.8, 350.5) | (-486.3, 349.2) | (-115.5, 224.2) | (-246.1, 183.2) | (-250.4, 195.2) | (-266.2, 156.0) | (-389.1, 232.9)  | (246.6, 950.4) | (876.5, 1,365.7)    | (-412.3, 315.1) | (-295.1, 215.2) | (-336.5, 176.8) |
| Observations                    | 3,966           | 3,966           | 3,966           | 3,966           | 3,966           | 3,966           | 3,966            | 3,966          | 3,966               | 3,966           | 3,966           | 3,966           |
| Log Likelihood                  | -7,270.50       | -7,639.10       | -5,244.50       | -5,918.00       | -6,022.30       | -5,871.00       | -6,912.40        | -7,223.80      | -6,278.50           | -7,304.70       | -6,393.00       | -6,408.50       |
| Akaike Inf. Crit.               | 14,998.90       | 15,736.10       | 10,947.00       | 12,293.90       | 12,502.60       | 12,200.00       | 14,282.80        | 14,905.60      | 13,015.00           | 15,067.50       | 13,244.00       | 13,274.90       |

eTable 5. Percent differences in utilization (encounters per 1,000 member months).

Percent differences in utilization by place of service and type of provider among those typically utilizing the on-site/near-site clinics for primary care, relative to those using off-site clinics, estimated through multivariable adjusted regressions after matching. Not displayed are the 3,022 rows of additional Clinical Classifications Software (CCS) dummy variables, and home zip codes across all members, which were additional controls in all regressions. 95% confidence intervals in parentheses. \* p<0.05; \*\* p<0.01; \*\*\* p<0.001

|                                 | Emergency     | Hospital       | Primary Care | Specialist   | Mental Health | Physical Therapy | Drug admin   | Surgery      | Labs          | Radiology    |
|---------------------------------|---------------|----------------|--------------|--------------|---------------|------------------|--------------|--------------|---------------|--------------|
| Treatment group, versus control | -2.5***       | -0.9***        | 1.2**        | -4.9***      | 1.1**         | -2.9**           | -2.5***      | -4.0***      | -6.4***       | -3.4***      |
|                                 | (-3.5, -1.5)  | (-1.2, -0.5)   | (0.4, 2.0)   | (-5.5, -4.4) | (0.4, 1.8)    | (-4.8, -1.1)     | (-3.5, -1.6) | (-4.7, -3.2) | (-8.2, -4.6)  | (-3.9, -2.8) |
| Age, yrs                        | -0.01         | -0.03**        | 0.03         | 0.1***       | 0.01          | 0.2***           | -0.2***      | 0.1***       | 0.4***        | 0.1***       |
|                                 | (-0.1, 0.03)  | (-0.04, -0.01) | (-0.01, 0.1) | (0.1, 0.1)   | (-0.02, 0.04) | (0.1, 0.3)       | (-0.3, -0.2) | (0.1, 0.1)   | (0.3, 0.5)    | (0.1, 0.1)   |
| Female                          | 0.3           | -0.01          | 1.9**        | -0.4         | 1.5**         | -1.4             | -1           | 2.6***       | 12.1***       | 3.2***       |
|                                 | (-1.1, 1.7)   | (-0.5, 0.5)    | (0.7, 3.0)   | (-1.2, 0.5)  | (0.6, 2.5)    | (-4.1, 1.2)      | (-2.4, 0.3)  | (1.5, 3.6)   | (9.6, 14.7)   | (2.4, 4.0)   |
| Months of enrollment            | -0.2***       | -0.03***       | -0.4***      | -0.1***      | -0.1***       | -0.2***          | -0.2***      | -0.1***      | -0.7***       | -0.1***      |
|                                 | (-0.2, -0.1)  | (-0.04, -0.01) | (-0.4, -0.4) | (-0.2, -0.1) | (-0.1, -0.04) | (-0.3, -0.1)     | (-0.3, -0.2) | (-0.1, -0.1) | (-0.7, -0.6)  | (-0.1, -0.1) |
| HCC risk score                  | -7.3          | 3.2            | 17.3*        | 13.3*        | -3.9          | -26              | 25.4*        | 8.7          | 30            | -9.6         |
|                                 | (-29.0, 14.4) | (-3.9, 10.3)   | (0.1, 34.6)  | (1.2, 25.5)  | (-18.3, 10.6) | (-68.6, 16.5)    | (4.6, 46.2)  | (-7.3, 24.6) | (-10.2, 70.3) | (-21.9, 2.7) |
| Observations                    | 3,656         | 3,656          | 3,656        | 3,656        | 3,656         | 3,656            | 3,656        | 3,656        | 3,656         | 3,656        |
| Log Likelihood                  | 1,826.10      | 5,708.90       | 1,640.00     | 3,525.30     | 3,421.60      | -166.5           | 1,452.10     | 2,820.90     | -712.6        | 3,392.10     |
| Akaike Inf. Crit.               | -3,168.20     | -10,933.90     | -2,796.00    | -6,566.60    | -6,359.20     | 817              | -2,420.20    | -5,157.90    | 1,909.20      | -6,300.10    |

eTable 6. Percent differences in spending per encounter (\$US 2019/encounter).

Percent differences in spending per encounter by place of service and type of provider among those typically utilizing the on-site/near-site clinics for primary care, relative to those using off-site clinics, estimated through multivariable adjusted regressions after matching. Not displayed are the 3,022 rows of additional Clinical Classifications Software (CCS) dummy variables, and home zip codes across all members, which were additional controls in all regressions. 95% confidence intervals in parentheses. \* p<0.05; \*\* p<0.01; \*\*\* p<0.001

|                                 | Emergency      | Hospital           | Primary Care  | Specialist     | Mental Health   | Physical Therapy | Drug admin         | Surgery         | Labs           | Radiology       |
|---------------------------------|----------------|--------------------|---------------|----------------|-----------------|------------------|--------------------|-----------------|----------------|-----------------|
| Treatment group, versus control | 23.5***        | 245.6***           | 32.5***       | 17.9***        | -17.4***        | 59.5***          | 13.4***            | -5.8            | 5.0*           | -9.3*           |
|                                 | (17.8, 29.2)   | (232.2, 259.0)     | (29.9, 35.0)  | (14.2, 21.7)   | (-27.5, -7.3)   | (54.9, 64.1)     | (6.2, 20.6)        | (-17.5, 5.9)    | (0.1, 9.9)     | (-16.9, -1.7)   |
| Age, yrs                        | -0.3**         | -0.2               | 0.3***        | -0.02          | 0.2             | 0.5***           | -0.9***            | 1.0***          | 1.2***         | 1.9***          |
|                                 | (-0.6, -0.1)   | (-0.8, 0.4)        | (0.2, 0.4)    | (-0.2, 0.2)    | (-0.2, 0.7)     | (0.3, 0.7)       | (-1.2, -0.6)       | (0.5, 1.5)      | (1.0, 1.4)     | (1.6, 2.3)      |
| Female                          | -21.8***       | -31.6**            | -3.7*         | -4             | -0.04           | -12.5***         | 32.0***            | -5.1            | 12.3***        | 1.6             |
|                                 | (-30.0, -13.6) | (-51.0, -12.1)     | (-7.4, -0.04) | (-9.4, 1.4)    | (-14.6, 14.6)   | (-19.2, -5.9)    | (21.7, 42.4)       | (-22.0, 11.9)   | (5.3, 19.4)    | (-9.4, 12.6)    |
| Months of enrollment            | 0.2            | 0.6*               | -0.1          | 0.1            | 0.4             | -0.3*            | -0.2               | -0.7**          | -0.01          | 0.3*            |
|                                 | (-0.03, 0.5)   | (0.1, 1.2)         | (-0.2, 0.003) | (-0.04, 0.3)   | (-0.1, 0.8)     | (-0.5, -0.1)     | (-0.5, 0.1)        | (-1.1, -0.2)    | (-0.2, 0.2)    | (0.02, 0.7)     |
| HCC risk score                  | -83.2          | 4,388.9***         | -35.6         | -66.6          | -99.9           | -86.6            | 1,617.3**          | 33.4            | -64.5          | -57.8           |
|                                 | (-242.9, 76.5) | (3,813.9, 4,963.9) | (-95.9, 24.8) | (-161.1, 28.0) | (-458.5, 258.6) | (-208.7, 35.6)   | (1,400.4, 1,834.2) | (-420.5, 487.2) | (-195.3, 66.4) | (-293.0, 177.4) |
| Observations                    | 3,966          | 3,966              | 3,966         | 3,966          | 3,966           | 3,966            | 3,966              | 3,966           | 3,966          | 3,966           |
| Log Likelihood                  | -5,062.00      | -8,361.40          | -1,899.10     | -3,418.00      | -7,269.70       | -4,239.80        | -5,946.70          | -7,832.80       | -4,454.50      | -6,171.70       |
| Akaike Inf. Crit.               | 10,581.90      | 17,180.90          | 4,256.30      | 7,294.00       | 14,997.40       | 8,937.50         | 12,351.50          | 16,123.60       | 9,367.00       | 12,801.40       |

eTable 7. Sensitivity analysis on percent differences in spending (\$US 2019).

Percent differences in spending, per member per month among those typically utilizing the on-site/near-site clinics for primary care, relative to those using off-site clinics, after excluding newborns, those with neonatal intensive care unit admissions, pregnancy, dialysis, hospice, rehabilitation, or organ transplant histories; those members with over \$50,000 in claims spending per year; those with less than 11 months of enrollment; or those with only medical examination or immunization as modal principal diagnoses, estimated through multivariable adjusted regressions after matching. Not displayed are the 3,022 rows of additional Clinical Classifications Software (CCS) dummy variables, and home zip codes across all members, which were additional controls in all regressions. 95% confidence intervals in parentheses. \* p<0.05;

\*\* p<0.01; \*\*\* p<0.001

|                                 | Total Spend     | Emergency       | Hospital        | Primary Care    | Specialist      | Mental Health   | Physical Therapy | Rx               | Drug administration | Surgery         | Labs            | Radiology       |
|---------------------------------|-----------------|-----------------|-----------------|-----------------|-----------------|-----------------|------------------|------------------|---------------------|-----------------|-----------------|-----------------|
| Treatment group, versus control | -48.5***        | -38.1***        | -16.4**         | 100.7**         | -55.5***        | 16.6***         | -0.2             | -31.0***         | -1                  | -42.4***        | -29.4***        | -44.7***        |
|                                 | (-60.1, -36.8)  | (-50.8, -25.5)  | (-23.5, -9.4)   | (92.7, 108.8)   | (-63.6, -47.4)  | (8.4, 24.7)     | (-10.6, 10.3)    | (-42.3, -19.7)   | (-9.7, 7.7)         | (-54.3, -30.6)  | (-38.5, -20.3)  | (-54.0, -35.3)  |
| Age, yrs                        | 0.7*            | -0.7*           | -0.2            | 0.6**           | 1.1***          | -0.3            | 1.1***           | 1.9***           | -1.8***             | 1.7***          | 1.6***          | 1.6***          |
|                                 | (0.2, 1.2)      | (-1.2, -0.1)    | (-0.5, 0.2)     | (0.2, 0.9)      | (0.7, 1.5)      | (-0.6, 0.1)     | (0.7, 1.6)       | (1.4, 2.4)       | (-2.2, -1.4)        | (1.2, 2.3)      | (1.2, 2.0)      | (1.2, 2.0)      |
| Female                          | 56.6***         | 6               | 7.1             | 28.1***         | 2.9             | 3.3             | -7.6             | 160.3**          | 10.1                | 37.8***         | 73.0***         | 55.6***         |
|                                 | (40.0, 73.2)    | (-12.1, 24.0)   | (-2.9, 17.2)    | (16.6, 39.5)    | (-8.6, 14.5)    | (-8.3, 14.9)    | (-22.5, 7.4)     | (144.2, 176.4)   | (-2.2, 22.5)        | (20.9, 54.8)    | (60.0, 86.0)    | (42.3, 68.8)    |
| Months of enrollment            | -3.0***         | -0.8**          | -0.2            | -2.1***         | -0.7***         | -0.5*           | -0.5*            | -1.7***          | -1.0***             | -0.2            | -1.5***         | -0.7**          |
|                                 | (-3.5, -2.4)    | (-1.4, -0.2)    | (-0.5, 0.1)     | (-2.5, -1.7)    | (-1.1, -0.3)    | (-0.9, -0.1)    | (-1.0, -0.001)   | (-2.3, -1.2)     | (-1.4, -0.6)        | (-0.8, 0.3)     | (-1.9, -1.0)    | (-1.1, -0.2)    |
| HCC risk score                  | -22.9           | -79.3           | -46.1           | -45.2           | -63.6           | -43.3           | -52.2            | 936.7**          | 1,957.1***          | -51             | -66.9           | -79             |
|                                 | (-484.7, 438.9) | (-614.1, 455.5) | (-263.9, 171.7) | (-306.5, 216.0) | (-328.1, 200.8) | (-308.3, 221.6) | (-442.3, 338.0)  | (496.5, 1,376.9) | (1,665.7, 2,248.5)  | (-530.0, 428.0) | (-381.3, 247.6) | (-404.6, 246.6) |
| Observations                    | 3,014           | 3,014           | 3,014           | 3,014           | 3,014           | 3,014           | 3,014            | 3,014            | 3,014               | 3,014           | 3,014           | 3,014           |
| Log Likelihood                  | -5,469.30       | -5,720.40       | -4,014.80       | -4,392.70       | -4,417.30       | -4,421.60       | -5,167.70        | -5,385.10        | -4,611.80           | -5,533.00       | -4,760.70       | -4,828.20       |

|                      |               |               |              |              |              |              |               |               |              |               |              |               |
|----------------------|---------------|---------------|--------------|--------------|--------------|--------------|---------------|---------------|--------------|---------------|--------------|---------------|
| Akaike Inf.<br>Crit. | 11,364<br>.60 | 11,866<br>.80 | 8,455.<br>60 | 9,211.<br>40 | 9,260.<br>60 | 9,269.1<br>0 | 10,761.4<br>0 | 11,196<br>.20 | 9,649<br>.50 | 11,491<br>.90 | 9,947.<br>40 | 10,082<br>.50 |
|----------------------|---------------|---------------|--------------|--------------|--------------|--------------|---------------|---------------|--------------|---------------|--------------|---------------|

eTable 8. Sensitivity analysis on percent differences in utilization (encounters per 1,000 member months).

Percent differences in utilization by place of service and type of provider among those typically utilizing the on-site/near-site clinics for primary care, relative to those using off-site clinics, after excluding newborns, those with neonatal intensive care unit admissions, pregnancy, dialysis, hospice, rehabilitation, or organ transplant histories; those members with over \$50,000 in claims spending per year; those with less than 11 months of enrollment; or those with only medical examination or immunization as modal principal diagnoses, estimated through multivariable adjusted regressions after matching. Not displayed are the 3,022 rows of additional Clinical Classifications Software (CCS) dummy variables, and home zip codes across all members, which were additional controls in all regressions. 95% confidence intervals in parentheses. \* p<0.05;

\*\* p<0.01; \*\*\* p<0.001

|                                 | Emergency     | Hospital      | Primary Care  | Specialist    | Mental Health | Physical Therapy | Drug admin   | Surger y      | Labs          | Radiology    |
|---------------------------------|---------------|---------------|---------------|---------------|---------------|------------------|--------------|---------------|---------------|--------------|
| Treatment group, versus control | -3.0***       | -0.8***       | 0.7           | -4.8***       | 0.8*          | -4.7***          | -1.9***      | -3.7***       | -5.5***       | -3.7***      |
|                                 | (-4.1, -2.0)  | (-1.2, -0.4)  | (-0.02, 1.5)  | (-5.3, -4.2)  | (0.2, 1.5)    | (-6.7, -2.7)     | (-2.8, -1.0) | (-4.5, -2.9)  | (-7.3, -3.7)  | (-4.4, -3.0) |
| Age, yrs                        | -0.04         | -0.003        | 0.04*         | 0.1***        | 0.01          | 0.2***           | -0.2***      | 0.1***        | 0.3***        | 0.1***       |
|                                 | (-0.1, 0.01)  | (-0.02, 0.01) | (0.01, 0.1)   | (0.04, 0.1)   | (-0.03, 0.04) | (0.1, 0.3)       | (-0.2, -0.1) | (0.1, 0.1)    | (0.3, 0.4)    | (0.1, 0.1)   |
| Female                          | 1             | 0.2           | 3.1***        | -0.01         | 0.3           | -0.9             | -0.3         | 3.0***        | 15.1***       | 3.8***       |
|                                 | (-0.5, 2.5)   | (-0.3, 0.7)   | (2.0, 4.1)    | (-0.8, 0.7)   | (-0.6, 1.3)   | (-3.8, 2.0)      | (-1.6, 1.0)  | (1.8, 4.1)    | (12.6, 17.7)  | (2.9, 4.7)   |
| Months of enrollment            | -0.1***       | -0.01         | -0.2***       | -0.1***       | -0.1***       | -0.2***          | -0.2***      | -0.1***       | -0.5***       | -0.1***      |
|                                 | (-0.2, -0.1)  | (-0.03, 0.01) | (-0.3, -0.2)  | (-0.1, -0.1)  | (-0.1, -0.02) | (-0.3, -0.1)     | (-0.2, -0.1) | (-0.1, -0.04) | (-0.6, -0.4)  | (-0.1, -0.1) |
| HCC risk score                  | -9.7          | -2.8          | 5.3           | -0.2          | -2            | -14.5            | 28.8**       | 7.5           | -10.4         | -8.2         |
|                                 | (-33.0, 13.6) | (-10.8, 5.1)  | (-11.1, 21.8) | (-11.7, 11.3) | (-16.6, 12.7) | (-62.1, 33.0)    | (8.9, 48.7)  | (-10.7, 25.7) | (-51.9, 31.1) | (-22.4, 6.0) |
| Observations                    | 3,014         | 3,014         | 3,014         | 3,014         | 3,014         | 3,014            | 3,014        | 3,014         | 3,014         | 3,014        |
| Log Likelihood                  | 1,694.30      | 4,832.50      | 2,698.20      | 3,748.90      | 3,038.70      | -288.4           | 2,145.40     | 2,400.30      | 80.5          | 3,126.50     |
| Akaike Inf. Crit.               | -2,962.60     | -9,239.00     | -4,970.30     | -7,071.80     | -5,651.40     | 1,002.90         | -3,864.80    | -4,374.60     | 265.1         | -5,827.00    |

eTable 9. Sensitivity analysis on percent differences in spending per encounter (\$US 2019/encounter).

Spending per encounter by place of service and type of provider among those typically utilizing the on-site/near-site clinics for primary care, relative to those using off-site clinics, after excluding newborns, those with neonatal intensive care unit admissions, pregnancy, dialysis, hospice, rehabilitation, or organ transplant histories; those members with over \$50,000 in claims spending per year; those with less than 11 months of enrollment; or those with only medical examination or immunization as modal principal diagnoses, estimated through multivariable adjusted regressions after matching. Not displayed are the 3,022 rows of additional Clinical Classifications Software (CCS) dummy variables, and home zip codes across all members, which were additional controls in all regressions. 95% confidence intervals in parentheses. \* p<0.05; \*\* p<0.01; \*\*\* p<0.001

|                                 | Emergency       | Hospital           | Primary Care   | Specialist     | Mental Health   | Physical Therapy | Drug admin         | Surgery         | Labs            | Radiology       |
|---------------------------------|-----------------|--------------------|----------------|----------------|-----------------|------------------|--------------------|-----------------|-----------------|-----------------|
| Treatment group, versus control | 20.5***         | 249.9***           | 29.8***        | 16.5***        | -16.6**         | 62.3***          | 13.3**             | -5.3            | 5.8*            | -10.1*          |
|                                 | (14.0, 27.0)    | (234.3, 265.6)     | (27.1, 32.6)   | (12.2, 20.8)   | (-28.0, -5.2)   | (56.8, 67.7)     | (5.1, 21.5)        | (-19.1, 8.4)    | (0.1, 11.4)     | (-18.8, -1.5)   |
| Age, yrs                        | -0.2            | -0.2               | 0.3***         | 0.01           | 0.4             | 0.6***           | -1.0***            | 1.2***          | 1.2***          | 1.9***          |
|                                 | (-0.5, 0.1)     | (-0.9, 0.5)        | (0.2, 0.4)     | (-0.2, 0.2)    | (-0.1, 1.0)     | (0.3, 0.8)       | (-1.4, -0.7)       | (0.6, 1.9)      | (0.9, 1.4)      | (1.5, 2.3)      |
| Female                          | -25.9***        | -34.6**            | -5.9**         | -6.8*          | -4.3            | -10.9**          | 39.7***            | -5.3            | 15.0***         | 7.1             |
|                                 | (-35.2, -16.6)  | (-57.0, -12.2)     | (-9.8, -2.0)   | (-12.9, -0.6)  | (-20.6, 12.0)   | (-18.6, -3.3)    | (28.1, 51.3)       | (-24.9, 14.4)   | (6.9, 23.0)     | (-5.3, 19.5)    |
| Months of enrollment            | 0.1             | 0.4                | -0.1*          | 0.03           | 0.1             | -0.3*            | -0.1               | -1.1***         | -0.03           | 0.4             |
|                                 | (-0.2, 0.4)     | (-0.3, 1.2)        | (-0.3, -0.002) | (-0.2, 0.2)    | (-0.5, 0.6)     | (-0.6, -0.1)     | (-0.4, 0.3)        | (-1.8, -0.5)    | (-0.3, 0.2)     | (-0.03, 0.8)    |
| HCC risk score                  | 7.6             | 6,489.3***         | -33.7          | -76.8          | -99.8           | -86.4            | 1,452.1**          | -42.2           | -60.8           | -24.9           |
|                                 | (-186.9, 202.2) | (5,699.1, 7,279.5) | (-100.5, 33.2) | (-190.8, 37.2) | (-549.7, 350.0) | (-238.1, 65.3)   | (1,185.0, 1,719.2) | (-660.9, 576.4) | (-222.5, 101.0) | (-316.6, 266.7) |
| Observations                    | 3,014           | 3,014              | 3,014          | 3,014          | 3,014           | 3,014            | 3,014              | 3,014           | 3,014           | 3,014           |
| Log Likelihood                  | -3,772.10       | -6,338.90          | -1,197.40      | -2,541.50      | -5,423.40       | -3,214.90        | -4,437.60          | -5,959.40       | -3,361.50       | -4,613.50       |



|                   |              |               |          |              |           |          |              |               |              |              |
|-------------------|--------------|---------------|----------|--------------|-----------|----------|--------------|---------------|--------------|--------------|
| Akaike Inf. Crit. | 7,970.1<br>0 | 13,103.8<br>0 | 2,820.80 | 5,509.0<br>0 | 11,272.90 | 6,855.80 | 9,301.1<br>0 | 12,344.8<br>0 | 7,149.0<br>0 | 9,653.0<br>0 |
|-------------------|--------------|---------------|----------|--------------|-----------|----------|--------------|---------------|--------------|--------------|

eTable 10. Descriptive statistics for the primary treatment group versus the alternative control group of unsubsidized members from other employers.

The treatment group are those using the subsidized on-site/near-site primary care clinics for the majority of primary care evaluation and management visits, while the control group are those in similar preferred-provider-organization health plans sponsored by employers who did not have available an on-site/near-site primary care clinic, and did not get subsidized use of on-site/near-site primary care clinics. The matching included all 3,022 Clinical Classifications Software (CCS) categories, of which the top five most prevalent are listed here. SD: standard deviation.

| Characteristic                                                         | Group         |               | Standardized Mean Difference |
|------------------------------------------------------------------------|---------------|---------------|------------------------------|
|                                                                        | Control       | Treatment     |                              |
| <b>Before matching</b>                                                 |               |               |                              |
| N                                                                      | 31,497        | 1,973         | -                            |
| Age, yrs (SD)                                                          | 27.7 (15.6)   | 30.5 (8.5)    | 0.223                        |
| Female, %                                                              | 13294 (42.2)  | 313 (14.7)    | 0.641                        |
| HCC risk score (including those at zero risk, SD)                      | 0.086 (0.329) | 0.073 (0.181) | 0.048                        |
| HCC risk score (for those above zero risk, SD)                         | 0.586 (0.668) | 0.424 (0.204) | 0.332                        |
| Months of enrollment (SD)                                              | 25.6 (15.5)   | 32.6 (14.2)   | 0.467                        |
| Common CCS diagnosis categories                                        |               |               |                              |
| Medical examination/evaluation, N (%)                                  | 1467 (4.7)    | 431 (21.8)    | 5.523                        |
| Immunizations and screening for infectious disease, N (%)              | 244 (0.8)     | 641 (32.5)    | 6.584                        |
| Spondylosis; intervertebral disc disorders; other back problems, N (%) | 525 (1.7)     | 98 (5.0)      | 13.218                       |
| Other upper respiratory infections, N (%)                              | 211 (0.7)     | 44 (2.2)      | 30.022                       |
| Other non-traumatic joint disorders, N (%)                             | 207 (0.7)     | 77 (3.9)      | 22.396                       |
| Highest-cost CCS diagnostic categories (\$US 2019)                     |               |               |                              |
| Secondary malignancies, \$67,482 PMPM                                  | 1 (<0.1)      | 0 (0.0)       | 31499.000                    |
| Non-Hodgkin's lymphoma, \$25,398 PMPM                                  | 1 (<0.1)      | 0 (0.0)       | 31499.000                    |
| Multiple myeloma, \$22,410 PMPM                                        | 2 (<0.1)      | 0 (0.0)       | 15750.500                    |
| Hodkin's disease, \$22,017 PMPM                                        | 1 (<0.1)      | 0 (0.0)       | 31499.000                    |
| Ectopic pregnancy, \$20,936 PMPM                                       | 4 (<0.1)      | 0 (0.0)       | 7876.250                     |
| <b>After matching</b>                                                  |               |               |                              |
| N                                                                      | 1,680         | 1,680         | -                            |
| Age, yrs (SD)                                                          | 30.2 (14.6)   | 30.5 (8.7)    | 0.028                        |
| Female, %                                                              | 301 (17.9)    | 304 (18.1)    | 0.005                        |

|                                                                         |               |               |         |
|-------------------------------------------------------------------------|---------------|---------------|---------|
| HCC risk score (including those at zero risk, SD)                       | 0.082 (0.237) | 0.079 (0.187) | 0.014   |
| HCC risk score (for those above zero risk, SD)                          | 0.488 (0.369) | 0.422 (0.206) | 0.370   |
| Months of enrollment (SD)                                               | 31.3 (14.8)   | 31.4 (14.4)   | 0.010   |
| Common CCS diagnostic categories                                        |               |               |         |
| Medical examination/evaluation, N (%)                                   | 389 (23.2)    | 395 (23.5)    | 0.056   |
| Immunizations and screening for infectious disease, N (%)               | 457 (27.2)    | 483 (28.8)    | 0.191   |
| Spondylosis; intervertebral disc disorders; other back problems, N (%)  | 98 (5.8)      | 90 (5.4)      | 0.852   |
| Other upper respiratory infections, N (%)                               | 46 (2.7)      | 42 (2.5)      | 1.827   |
| Other non-traumatic joint disorders, N (%)                              | 72 (4.3)      | 68 (4.0)      | 0.746   |
| Highest-cost diagnostic categories (\$US 2019)                          |               |               |         |
| Cardiac and circulatory congenital anomalies, N (%)<br>\$8847 PMPM      | 1 (<0.1)      | 2 (0.1)       | 336.721 |
| Heart valve disorders, N (%)<br>\$5004 PMPM                             | 3 (0.2)       | 2 (0.1)       | 129.646 |
| Other acquired deformities, N (%)<br>\$4553 PMPM                        | 4 (0.2)       | 4 (0.2)       | 0.000   |
| Chronic kidney disease, N (%)<br>\$4262 PMPM                            | 2 (0.1)       | 1 (<0.1)      | 336.721 |
| Genitourinary symptoms and ill-defined conditions, N (%)<br>\$2104 PMPM | 24 (1.4)      | 25 (1.5)      | 1.441   |

eTable 11. Sensitivity analysis of alternative control group.

Unadjusted outcome rates among the study population, before and after the treated population was matched to the alternative control group of unsubsidized members from other employers.

|                                             | Spend                    |               | Utilization                      |               | Spend per encounter   |                 |
|---------------------------------------------|--------------------------|---------------|----------------------------------|---------------|-----------------------|-----------------|
|                                             | (US\$ 2019/member/month) |               | (encounters/1,000 member months) |               | (\$US 2019/encounter) |                 |
| Before match                                | Control                  | Treatment     | Control                          | Treatment     | Control               | Treatment       |
|                                             | (N = 31,497)             | (N = 2,133)   | (N = 31,497)                     | (N = 2,133)   | (N = 31,497)          | (N = 2,133)     |
| Total medical and pharmaceutical, mean (SD) | 251.3 (1764.4)           | 219.5 (536.8) |                                  |               |                       |                 |
| Pharmaceutical, mean (SD)                   | 61.8 (678.5)             | 38.4 (236.6)  |                                  |               |                       |                 |
| Emergency room, mean (SD)                   | 10.2 (104.9)             | 18.8 (100.6)  | 29.8 (371.5)                     | 52.5 (224.6)  | 399.9 (282.6)         | 391.4 (340.0)   |
| Hospitalization, mean (SD)                  | 8.7 (388.4)              | 5.5 (89.5)    | 3.6 (72.6)                       | 2.5 (30.0)    | 2523.1 (4728.4)       | 2791.0 (6504.5) |
| Primary care, mean (SD)                     | 8.9 (42.1)               | 25.6 (41.3)   | 61.6 (337.0)                     | 159.7 (246.8) | 162.1 (83.7)          | 161.7 (42.2)    |
| Specialist, mean (SD)                       | 4.2 (32.6)               | 2.9 (6.7)     | 34.9 (263.2)                     | 22.9 (48.2)   | 133.1 (77.3)          | 125.7 (53.6)    |
| Mental health, mean (SD)                    | 2.6 (44.0)               | 7.5 (44.4)    | 13.8 (210.9)                     | 44.8 (255.0)  | 218.8 (416.6)         | 195.4 (322.0)   |
| Physical therapy, mean (SD)                 | 4.0 (44.2)               | 11.8 (57.9)   | 96.1 (993.3)                     | 196.8 (880.4) | 49.2 (59.2)           | 68.0 (39.8)     |
| Drug administration, mean (SD)              | 3.8 (81.7)               | 7.6 (81.9)    | 29.8 (219.0)                     | 81.0 (221.2)  | 93.1 (272.0)          | 73.7 (107.0)    |
| Surgery, mean (SD)                          | 26.9 (374.4)             | 14.1 (92.4)   | 33.3 (306.3)                     | 26.9 (91.8)   | 543.5 (1815.6)        | 363.8 (1595.1)  |
| Labs/pathology, mean (SD)                   | 6.3 (58.1)               | 6.5 (15.5)    | 155.8 (1062.0)                   | 313.7 (529.2) | 42.2 (98.5)           | 25.5 (28.7)     |
| Imaging, mean (SD)                          | 8.6 (184.2)              | 4.9 (29.4)    | 28.1 (228.5)                     | 33.2 (98.7)   | 227.6 (317.9)         | 129.2 (190.7)   |
| After match                                 | Control                  | Treatment     | Control                          | Treatment     | Control               | Treatment       |
|                                             | (N = 1,680)              | (N = 1,680)   | (N = 1,680)                      | (N = 1,680)   | (N = 1,680)           | (N = 1,680)     |
| Total medical and pharmaceutical, mean (SD) | 658.7 (2383.3)           | 224.0 (553.9) |                                  |               |                       |                 |
| Pharmaceutical, mean (SD)                   | 72.9 (385.2)             | 37.0 (240.1)  |                                  |               |                       |                 |

|                                |              |              |                |               |                 |                 |
|--------------------------------|--------------|--------------|----------------|---------------|-----------------|-----------------|
| Emergency room, mean (SD)      | 37.0 (154.6) | 22.2 (112.2) | 116.1 (766.7)  | 61.1 (248.5)  | 288.0 (124.0)   | 280.7 (118.9)   |
| Hospitalization, mean (SD)     | 34.1 (383.4) | 4.0 (61.4)   | 10.8 (84.8)    | 2.8 (33.4)    | 1050.7 (4348.2) | 1064.2 (4451.9) |
| Primary care, mean (SD)        | 29.8 (63.3)  | 25.6 (34.6)  | 197.0 (466.7)  | 159.5 (204.0) | 144.0 (89.2)    | 162.0 (43.6)    |
| Specialist, mean (SD)          | 13.5 (49.7)  | 3.1 (7.1)    | 107.0 (404.3)  | 24.2 (50.3)   | 84.5 (89.0)     | 43.5 (68.0)     |
| Mental health, mean (SD)       | 9.8 (80.9)   | 7.5 (39.6)   | 52.4 (368.9)   | 43.4 (207.2)  | 29.4 (125.8)    | 31.1 (158.3)    |
| Physical therapy, mean (SD)    | 9.0 (36.0)   | 11.5 (57.8)  | 224.0 (837.8)  | 198.8 (901.3) | 17.1 (41.3)     | 27.9 (43.7)     |
| Drug administration, mean (SD) | 11.0 (69.1)  | 7.4 (91.3)   | 115.1 (354.0)  | 72.3 (162.0)  | 38.8 (149.8)    | 39.1 (88.2)     |
| Surgery, mean (SD)             | 77.8 (554.7) | 14.7 (94.4)  | 79.9 (305.1)   | 28.2 (96.4)   | 252.1 (1971.2)  | 106.7 (904.0)   |
| Labs/pathology, mean (SD)      | 14.1 (65.8)  | 6.7 (16.3)   | 419.5 (1262.1) | 328.9 (532.2) | 27.2 (47.4)     | 24.0 (26.4)     |
| Imaging, mean (SD)             | 17.2 (76.4)  | 5.6 (32.8)   | 69.5 (176.9)   | 35.5 (99.3)   | 97.2 (218.5)    | 46.2 (122.6)    |

eTable 12. Sensitivity analysis on percent differences in spending (\$US 2019).

Percent differences in spending per member per month among those typically utilizing the on-site/near-site clinics for primary care, relative to the alternative control group of members from other employers without access to the on-site/near-site clinical offering, estimated through multivariable adjusted regressions after matching. Not displayed are the 3,022 rows of additional Clinical Classifications Software (CCS) dummy variables, and home zip codes across all members, which were additional controls in all regressions. 95% confidence intervals in parentheses. \* p<0.05; \*\* p<0.01; \*\*\* p<0.001

|                                 | Total Spend    | Emergency      | Hospital      | Primary Care  | Specialist     | Mental Health | Physical Therapy | Rx             | Drug admin    | Surgery        | Labs           | Radiology      |
|---------------------------------|----------------|----------------|---------------|---------------|----------------|---------------|------------------|----------------|---------------|----------------|----------------|----------------|
| Treatment group, versus control | -54.9***       | -19.3**        | -14.7**       | 21.9***       | -56.7***       | -6.4          | 32.2***          | -43.4***       | -5.6          | -42.6***       | -29.8***       | -46.3***       |
|                                 | (-67.1, -42.8) | (-33.1, -5.4)  | (-22.2, -7.2) | (13.2, 30.5)  | (-67.0, -46.3) | (-15.1, 2.3)  | (22.5, 41.8)     | (-58.1, -28.8) | (-15.8, 4.6)  | (-55.7, -29.5) | (-40.2, -19.5) | (-57.7, -35.0) |
| Age, yrs                        | 0.4            | -0.2           | -0.5***       | -0.6***       | 0.4*           | 0.1           | 0.1              | 1.3***         | -1.6***       | 1.1***         | 1.1***         | 0.6**          |
|                                 | (-0.03, 0.8)   | (-0.7, 0.2)    | (-0.7, -0.2)  | (-0.9, -0.3)  | (0.1, 0.8)     | (-0.2, 0.4)   | (-0.2, 0.4)      | (0.8, 1.8)     | (-1.9, -1.3)  | (0.6, 1.5)     | (0.8, 1.5)     | (0.2, 1.0)     |
| Female                          | -3.9           | -6             | 0.3           | -5.6          | -16.3**        | -6.1          | -11.6*           | 55.1***        | 10.5          | -6.3           | 12.3*          | 10             |
|                                 | (-17.5, 9.7)   | (-21.5, 9.5)   | (-8.1, 8.6)   | (-15.2, 4.0)  | (-27.8, -4.7)  | (-15.8, 3.6)  | (-22.4, -0.8)    | (38.8, 71.4)   | (-0.8, 21.9)  | (-20.9, 8.3)   | (0.7, 23.8)    | (-2.7, 22.7)   |
| Months of enrollment            | -3.1***        | -0.6**         | -0.4***       | -3.3***       | -0.8***        | -0.2          | -0.2             | -1.1***        | -0.7***       | -0.5*          | -1.5***        | -0.4*          |
|                                 | (-3.5, -2.8)   | (-1.0, -0.2)   | (-0.7, -0.2)  | (-3.6, -3.1)  | (-1.1, -0.5)   | (-0.5, 0.04)  | (-0.5, 0.1)      | (-1.5, -0.6)   | (-1.0, -0.4)  | (-0.9, -0.1)   | (-1.9, -1.2)   | (-0.8, -0.1)   |
| HCC risk score                  | 269.0**        | 146.6**        | 81.4**        | 90.0***       | 68.1***        | 69.1***       | 50.1***          | 222.8**        | 10.6          | 113.3**        | 90.6***        | 62.5***        |
|                                 | (243.2, 294.8) | (117.1, 176.1) | (65.7, 97.1)  | (71.9, 108.1) | (46.2, 89.9)   | (50.8, 87.4)  | (29.8, 70.4)     | (191.7, 254.0) | (-10.8, 32.1) | (85.5, 141.1)  | (68.7, 112.4)  | (38.5, 86.5)   |
| Observations                    | 3,360          | 3,360          | 3,360         | 3,360         | 3,360          | 3,360         | 3,360            | 3,360          | 3,360         | 3,360          | 3,360          | 3,360          |
| Log Likelihood                  | -5,680.20      | -6,105.40      | -4,097.90     | -4,546.30     | -5,153.70      | -4,579.90     | -4,918.90        | -6,274.30      | -5,091.30     | -5,912.90      | -5,152.40      | -5,451.90      |
| Akaike Inf. Crit.               | 11,920.40      | 12,770.90      | 8,755.80      | 9,652.60      | 10,867.30      | 9,719.80      | 10,397.80        | 13,108.50      | 10,742.50     | 12,385.90      | 10,864.80      | 11,463.90      |

eTable 13. Sensitivity analysis on percent differences in utilization (encounters per 1,000 member months).

Percent differences in utilization by place of service and type of provider among those typically utilizing the on-site/near-site clinics for primary care, relative to the alternative control group of members from other employers without access to the on-site/near-site clinical offering, estimated through multivariable adjusted regressions after matching. Not displayed are the 3,022 rows of additional Clinical Classifications Software (CCS) dummy variables, and home zip codes across all members, which were additional controls in all regressions. 95% confidence intervals in parentheses. \* p<0.05; \*\* p<0.01; \*\*\* p<0.001

|                                 | Emergency    | Hospital       | Primary Care  | Specialist   | Mental Health | Physical Therapy | Drug admin   | Surgery      | Labs         | Radiology     |
|---------------------------------|--------------|----------------|---------------|--------------|---------------|------------------|--------------|--------------|--------------|---------------|
| Treatment group, versus control | -2.7***      | -0.7***        | -3.1***       | -5.7***      | -1.2**        | 1                | -1.9***      | -4.1***      | -4.5***      | -3.8***       |
|                                 | (-4.1, -1.2) | (-1.1, -0.4)   | (-4.3, -1.8)  | (-6.7, -4.8) | (-2.1, -0.4)  | (-1.2, 3.1)      | (-3.0, -0.9) | (-5.1, -3.1) | (-6.9, -2.2) | (-4.6, -2.9)  |
| Age, yrs                        | 0.002        | -0.02***       | -0.1*         | 0.1***       | 0.05**        | 0.01             | -0.2***      | 0.1**        | 0.2***       | 0.02          |
|                                 | (-0.05, 0.1) | (-0.04, -0.01) | (-0.1, -0.01) | (0.02, 0.1)  | (0.02, 0.1)   | (-0.1, 0.1)      | (-0.2, -0.1) | (0.02, 0.1)  | (0.1, 0.3)   | (-0.003, 0.1) |
| Female                          | -1           | -0.3           | -1.9**        | -1.6**       | -0.3          | -2.8*            | -1.4*        | -1.3*        | 3.3*         | -0.01         |
|                                 | (-2.6, 0.6)  | (-0.8, 0.1)    | (-3.3, -0.5)  | (-2.7, -0.6) | (-1.3, 0.6)   | (-5.2, -0.4)     | (-2.6, -0.2) | (-2.4, -0.1) | (0.6, 6.0)   | (-0.9, 0.9)   |
| Months of enrollment            | -0.2***      | -0.04***       | -0.6***       | -0.2***      | -0.1***       | -0.2***          | -0.2***      | -0.2***      | -0.8***      | -0.1***       |
|                                 | (-0.2, -0.1) | (-0.05, -0.02) | (-0.6, -0.5)  | (-0.2, -0.2) | (-0.1, -0.1)  | (-0.3, -0.1)     | (-0.3, -0.2) | (-0.2, -0.1) | (-0.8, -0.7) | (-0.2, -0.1)  |
| HCC risk score                  | 4.1**        | 1.9***         | 6.7***        | 1            | 0.1           | 7.7***           | 0.9          | 1.4          | 15.8***      | 2.6**         |
|                                 | (1.2, 7.0)   | (1.1, 2.6)     | (4.1, 9.3)    | (-0.9, 2.9)  | (-1.7, 1.9)   | (3.2, 12.1)      | (-1.4, 3.1)  | (-0.7, 3.5)  | (10.9, 20.8) | (1.0, 4.3)    |
| Observations                    | 3,360        | 3,360          | 3,360         | 3,360        | 3,360         | 3,360            | 3,360        | 3,360        | 3,360        | 3,360         |
| Log Likelihood                  | 1,432.10     | 5,834.00       | 1,812.50      | 2,832.40     | 3,090.30      | 44.7             | 2,330.60     | 2,605.60     | -295.4       | 3,351.20      |
| Akaike Inf. Crit.               | -2,304.20    | -11,108.10     | -3,065.00     | -5,104.80    | -5,620.60     | 470.6            | -4,101.10    | -4,651.30    | 1,150.70     | -6,142.50     |

eTable 14. Sensitivity analysis on percent differences in spending per encounter (\$US 2019/encounter).

Spending per encounter by place of service and type of provider among those typically utilizing the on-site/near-site clinics for primary care, relative to the alternative control group of members from other employers without access to the on-site/near-site clinical offering, estimated through multivariable adjusted regressions after matching. Not displayed are the 3,022 rows of additional Clinical Classifications Software (CCS) dummy variables, and home zip codes across all members, which were additional controls in all regressions. 95% confidence intervals in parentheses. \* p<0.05; \*\* p<0.01; \*\*\* p<0.001

|                                 | Emergency    | Hospital     | Primary Care | Specialist     | Mental Health  | Physical Therapy | Drug admin    | Surgery        | Labs         | Radiology      |
|---------------------------------|--------------|--------------|--------------|----------------|----------------|------------------|---------------|----------------|--------------|----------------|
| Treatment group, versus control | 0.4          | 8.1          | 83.4***      | -75.1***       | -9.7           | 77.7***          | 11.7          | -53.7***       | 44.2***      | -48.9***       |
|                                 | (-2.4, 3.1)  | (-7.3, 23.6) | (73.5, 93.3) | (-94.8, -55.4) | (-23.8, 4.4)   | (62.2, 93.3)     | (-2.4, 25.8)  | (-74.5, -32.9) | (35.9, 52.5) | (-64.9, -33.0) |
| Age, yrs                        | -0.1         | -0.5         | -0.5**       | 0.7*           | 0.03           | 0.03             | -1.8***       | 1.7***         | 0.6***       | 0.5            |
|                                 | (-0.2, 0.03) | (-1.0, 0.1)  | (-0.9, -0.2) | (0.1, 1.4)     | (-0.4, 0.5)    | (-0.5, 0.6)      | (-2.3, -1.3)  | (1.0, 2.4)     | (0.4, 0.9)   | (-0.01, 1.1)   |
| Female                          | 1.4          | 10.7         | 2.2          | -23.8*         | -9.2           | -12.4            | 21.3**        | 23.1           | 14.2**       | 20.9*          |
|                                 | (-1.7, 4.4)  | (-6.5, 28.0) | (-8.8, 13.3) | (-45.8, -1.7)  | (-24.9, 6.5)   | (-29.7, 5.0)     | (5.5, 37.0)   | (-0.2, 46.5)   | (5.0, 23.5)  | (3.1, 38.7)    |
| Months of enrollment            | -0.04        | 0.04         | -0.3         | 1.9***         | 0.4*           | 1.2***           | 1.1***        | 0.8**          | 0.1          | 0.9***         |
|                                 | (-0.1, 0.05) | (-0.4, 0.5)  | (-0.6, 0.05) | (1.3, 2.5)     | (0.02, 0.9)    | (0.7, 1.7)       | (0.7, 1.5)    | (0.2, 1.4)     | (-0.1, 0.4)  | (0.4, 1.4)     |
| HCC risk score                  | 7.9**        | 24.1         | 20.3         | 187.8***       | 155.8***       | 10.5             | 7.8           | 122.1***       | 19.8*        | 116.0***       |
|                                 | (2.2, 13.5)  | (-8.9, 57.1) | (-0.5, 41.1) | (145.2, 230.5) | (125.9, 185.8) | (-22.7, 43.7)    | (-22.2, 37.7) | (76.9, 167.2)  | (2.4, 37.2)  | (81.9, 150.2)  |
| Observations                    | 3,360        | 3,360        | 3,360        | 3,360          | 3,360          | 3,360            | 3,360         | 3,360          | 3,360        | 3,360          |
| Log Likelihood                  | -753.4       | -6,454.30    | -4,999.00    | -7,240.70      | -6,154.70      | -6,473.70        | -6,150.20     | -7,416.90      | -4,423.80    | -6,556.80      |
| Akaike Inf. Crit.               | 2,066.80     | 13,468.60    | 10,558.10    | 15,041.30      | 12,869.50      | 13,507.30        | 12,860.30     | 15,393.90      | 9,407.70     | 13,673.70      |



eFigure 1. Quantile-quantile plot of log-transformed total medical and pharmaceutical spending (\$US 2019) compared to the theoretically-optimal line for ordinary least squares regression.

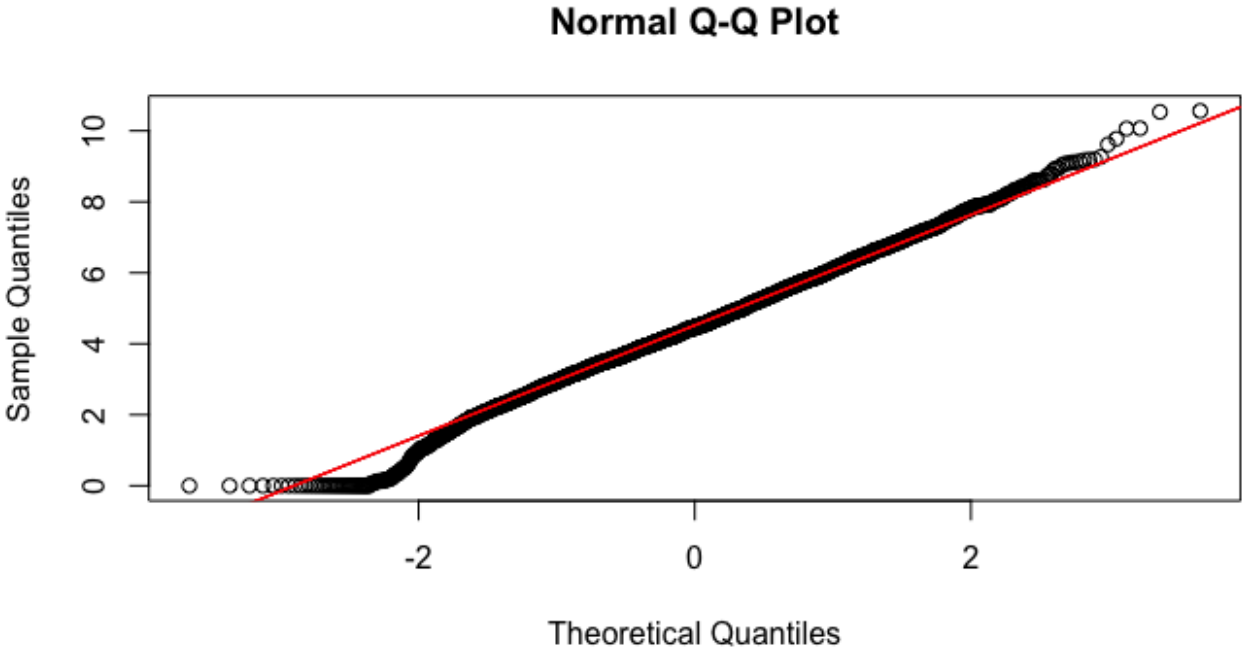

eFigure 2. Absolute differences in spending, utilization, and spending per encounter.

**(A) Differences in spending.** Dollar differences in spending (\$US 2019), per member per month among those most commonly utilizing subsidized on-site/near-site clinics for primary care, relative to those most commonly using unsubsidized off-site clinics. Error bars indicate 95% confidence intervals from multivariable regressions among matched cohorts, adjusted for age, sex, risk score, home zip code, enrollment duration, and modal Clinical Classifications Software (CCS) diagnosis category. Note the total spend refers to the association between on-site/near-site clinic use and total spending (regression coefficient), not the sum of other regression coefficients by subcategory.

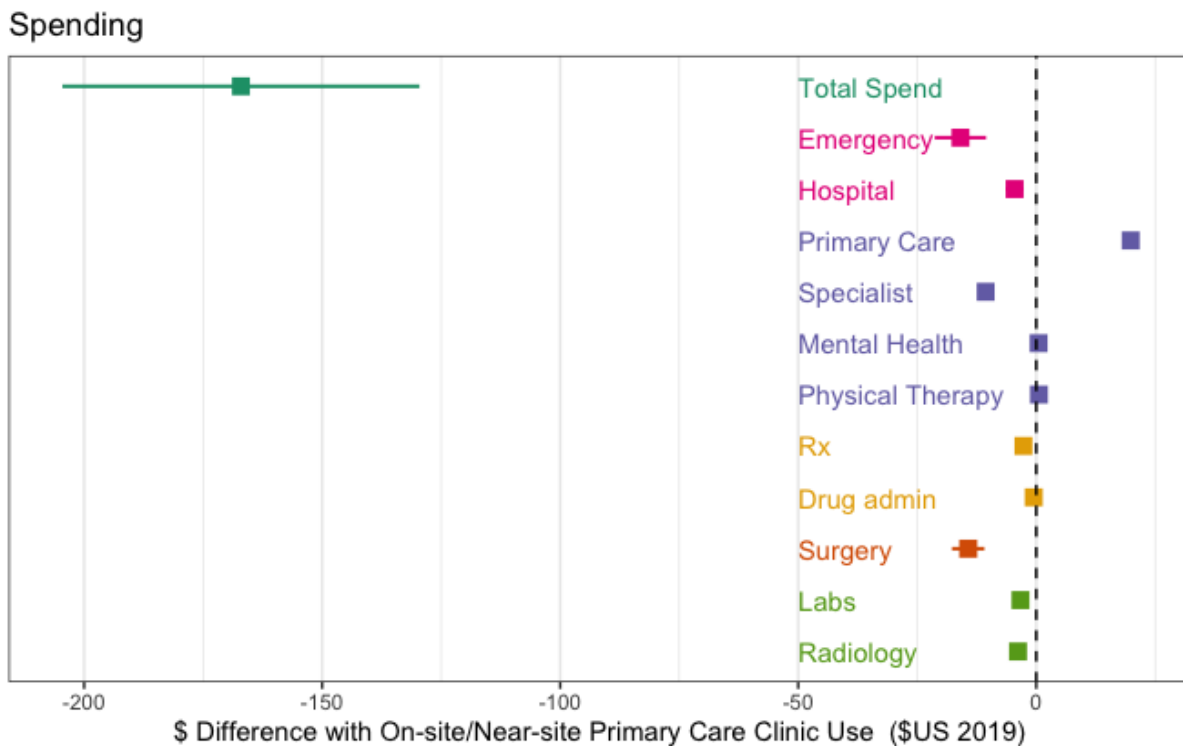

**(B) Differences in utilization.** Absolute differences in utilization (encounters per 1,000 member months) by place of service and type of provider among those most commonly utilizing the subsidized on-site/near-site clinics for primary care, relative to those most commonly utilizing unsubsidized off-site clinics. Error bars indicate 95% confidence intervals from multivariable regressions among matched cohorts, adjusted for age, sex, risk score, home zip code, enrollment duration, and modal Clinical Classifications Software (CCS) diagnosis category. Note the difference in the horizontal axis scale from eFigures 1a and 1c.

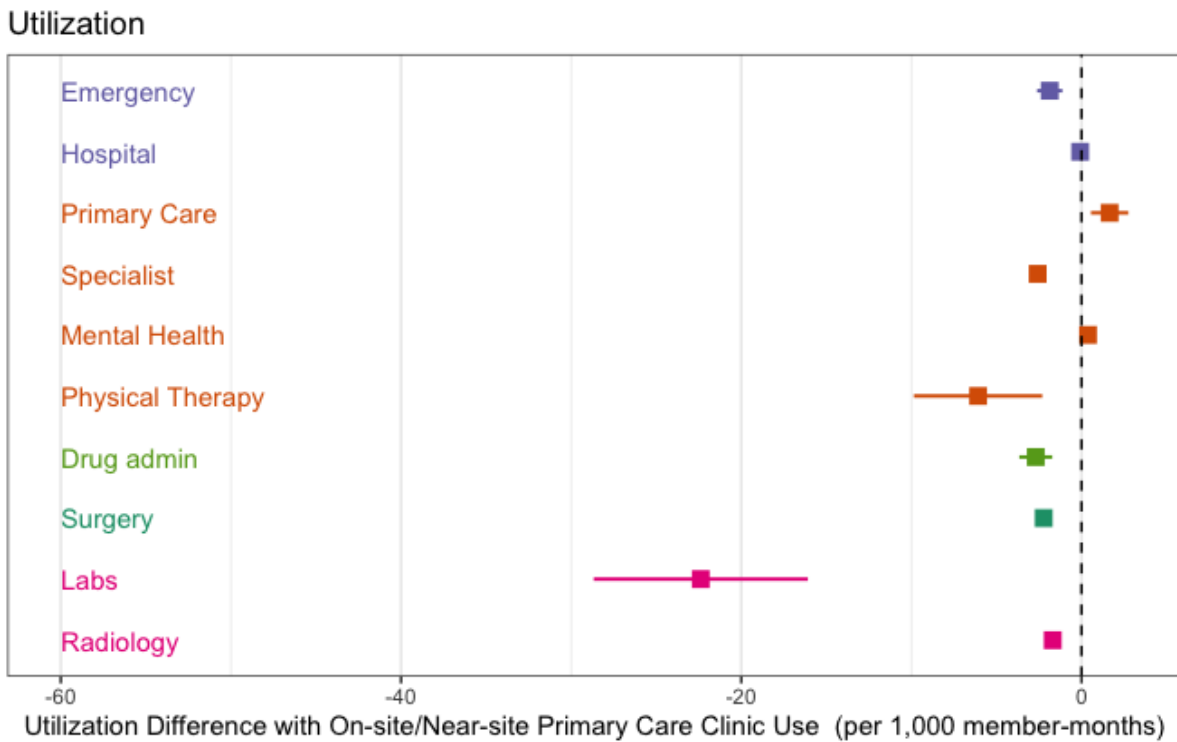

**(C) Differences in spending per encounter.** Dollar differences in spending per encounter (\$US 2019/encounter) by place of service and type of provider among those most commonly utilizing the subsidized on-site/near-site clinics for primary care, relative to those most commonly using unsubsidized off-site clinics. Error bars indicate 95% confidence intervals from multivariable regressions among matched cohorts, adjusted for age, sex, risk score, home zip code, enrollment duration, and modal Clinical Classifications Software (CCS) diagnosis category. Note the difference in horizontal axis scale from eFigures 1a and 1b.

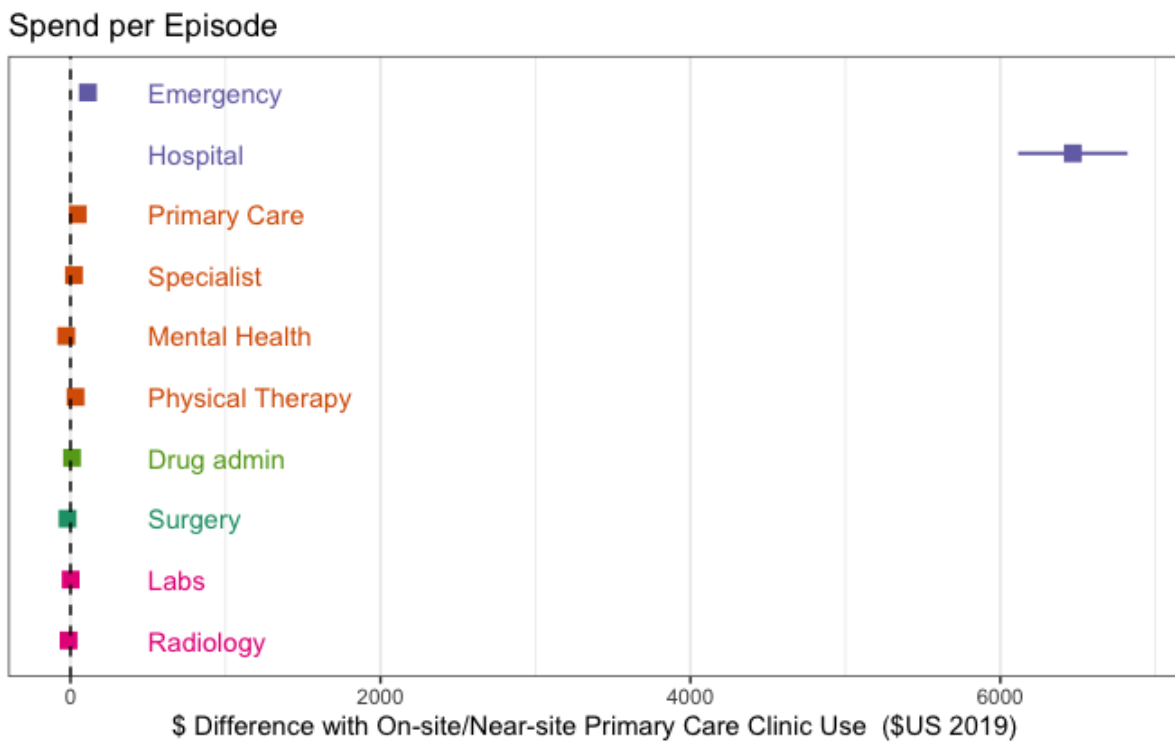

Supplement: jamanetwopen-3-e203803-s001.pdf [file jamanetwopen-3-e203803-s001.pdf]
